# Supplementary material for: Suppressive activity of Vδ2+ γδ T cells on αβ T cells is licensed by TCR signaling and correlates with signal strength
Source: Springer Nature journal article supplement (doi:10.1007/s00262-019-02469-8), 2020-01-25
Supplement: MOESM1 [file 17609162]

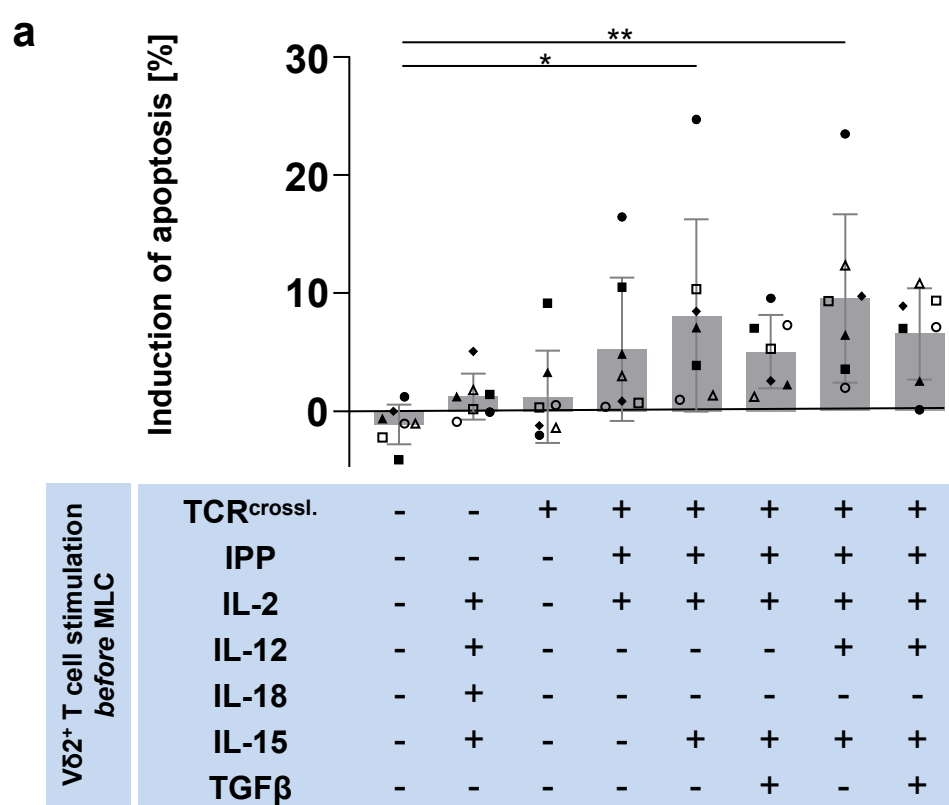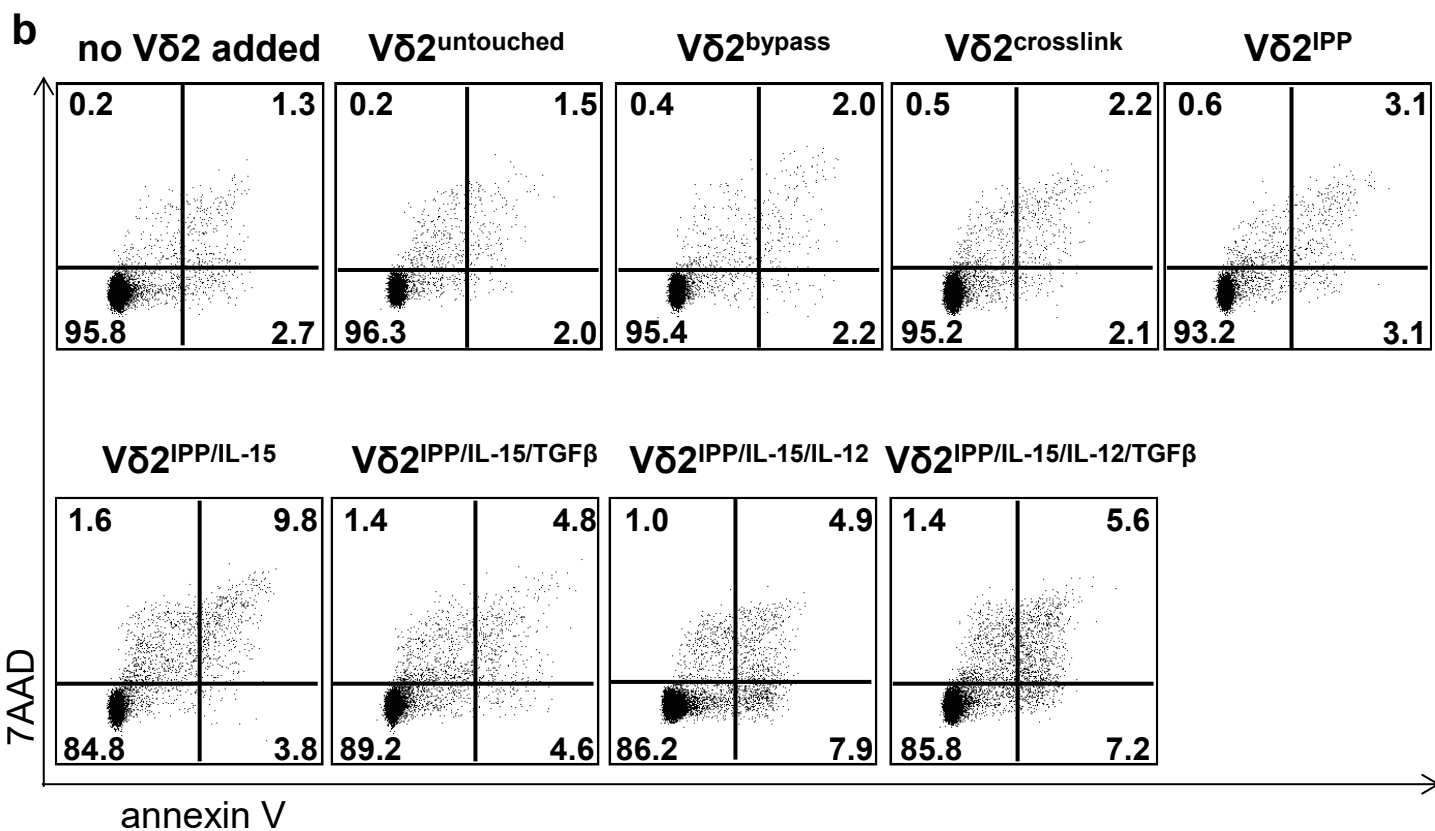

**Supplementary Figure S1: Apoptosis induction of  $\alpha\beta$  T cells by autologous Vδ2<sup>+</sup> T cells.** Isolated Vδ2<sup>+</sup> T cells after indicated stimulations were cultured at a 1:1 cell ratio with autologous PBMCs activated by anti-CD3/anti-CD28 Dynabeads. On day 1 of MLC, apoptotic  $\alpha\beta$  T cells were measured with flow cytometry and relative frequency of apoptotic cells, defined as annexin V<sup>+</sup> cells, was calculated by subtracting the frequency of annexin V<sup>+</sup> cells in CD3/CD28-stimulated  $\alpha\beta$  T cells in the absence of Vδ2<sup>+</sup> T cells. (a) Each symbol indicates an individual donor culture. The data were generated using Vδ2<sup>+</sup> T cells obtained from 7 different healthy donors. One-way ANOVA followed by Tukey's multiple comparison test was used. Bars represent the mean  $\pm$  SD. \* =  $p < 0.05$ , \*\* =  $p < 0.01$ , \*\*\* =  $p < 0.001$ , \*\*\*\* =  $p < 0.0001$ . Untouched: negatively isolated fresh Vδ2<sup>+</sup> T cells. Crosslink: fresh positively isolated Vδ2<sup>+</sup> T cells. (b) Flow cytometry plots of annexin V and 7AAD on  $\alpha\beta$  T cells from one representative donor are shown together with their corresponding negative control (without co-culture with Vδ2<sup>+</sup> T cells).

**a**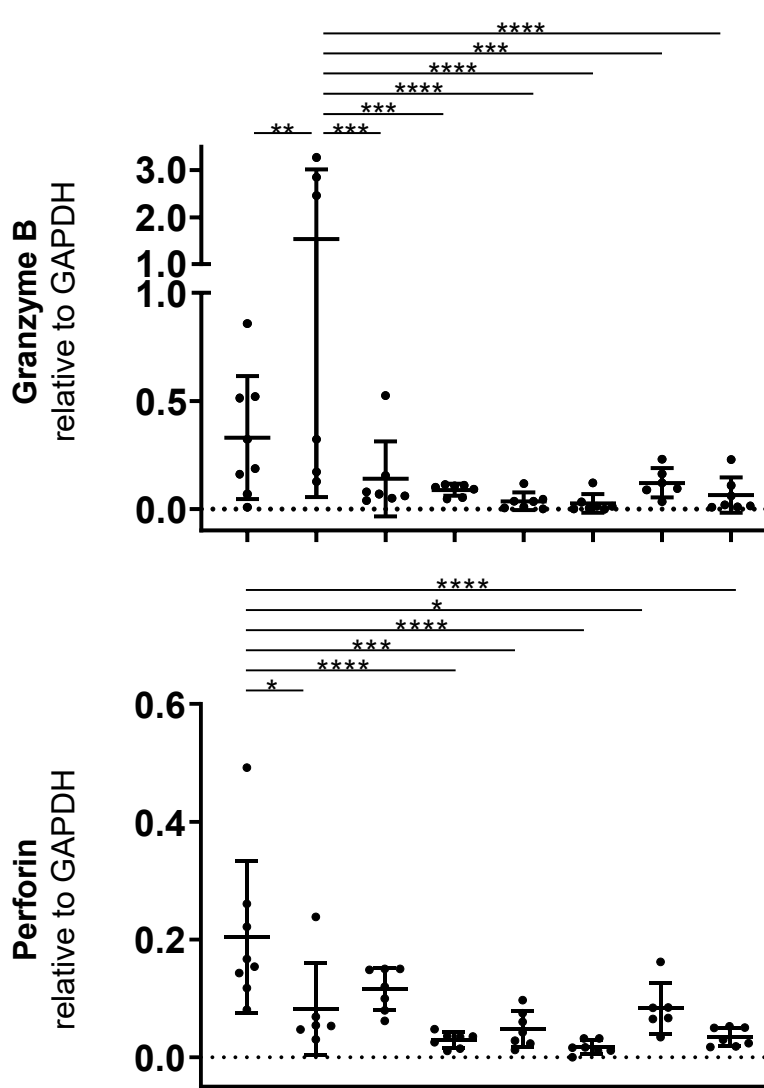

| Vδ2 <sup>+</sup> T cell stimulation before MLC | TCR <sup>crossl.</sup> |   |   |   |   |   |   |   |
|------------------------------------------------|------------------------|---|---|---|---|---|---|---|
|                                                | -                      | - | + | + | + | + | + | + |
|                                                | -                      | - | - | + | + | + | + | + |
|                                                | -                      | + | - | + | + | + | + | + |
|                                                | -                      | + | - | - | - | - | + | + |
|                                                | -                      | + | - | - | - | - | - | - |
|                                                | -                      | + | - | - | + | + | + | + |
|                                                | -                      | - | - | - | - | + | - | + |

**b**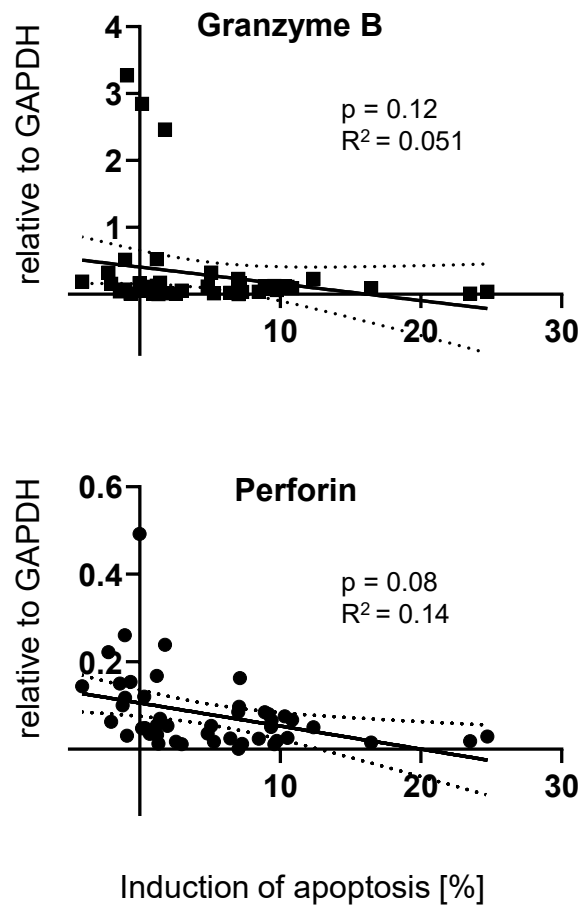

**Supplementary Figure S2: (a) Expression of granzyme B and perforin in Vδ2<sup>+</sup> T cells.** Vδ2<sup>+</sup> T cells were isolated and cultured as described in Materials and Methods. Vδ2<sup>+</sup> T cells were analyzed by qPCR. The data were generated using Vδ2<sup>+</sup> γδ T cells obtained from 7 different donors. One-way ANOVA followed by Tukey's multiple comparison test was used. Bars represent the mean ± SD. \* =  $p < 0.05$ , \*\* =  $p < 0.01$ , \*\*\* =  $p < 0.001$ , \*\*\*\* =  $p < 0.0001$ . **(b) Correlation between mRNA levels of cytotoxic granules and apoptosis induction.** The relationships between granzyme B and perforin mRNA expression on Vδ2<sup>+</sup> T cells and their apoptosis induction activity were compared using Fisher's exact test; the linear relationships were determined using Pearson's test.

## Granzyme B

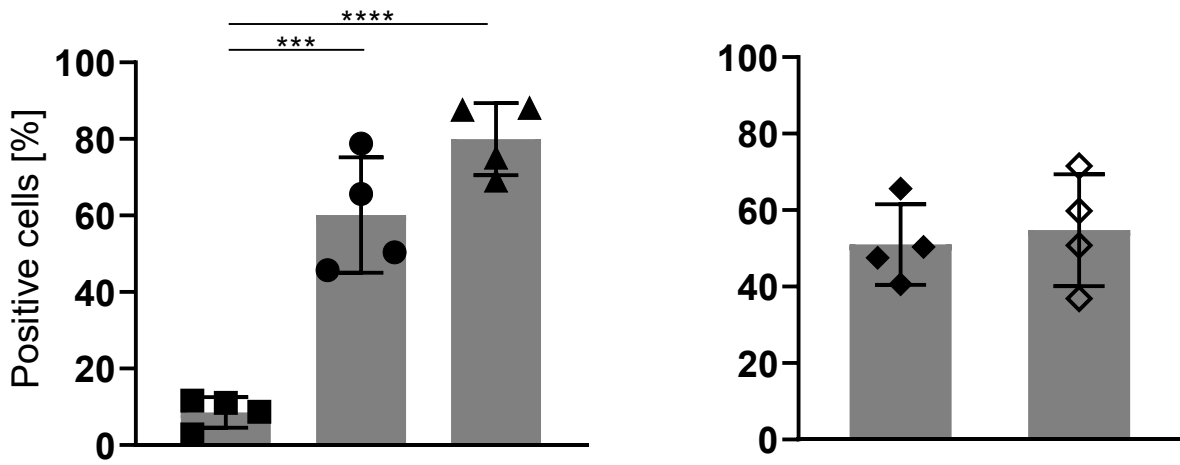

## Perforin

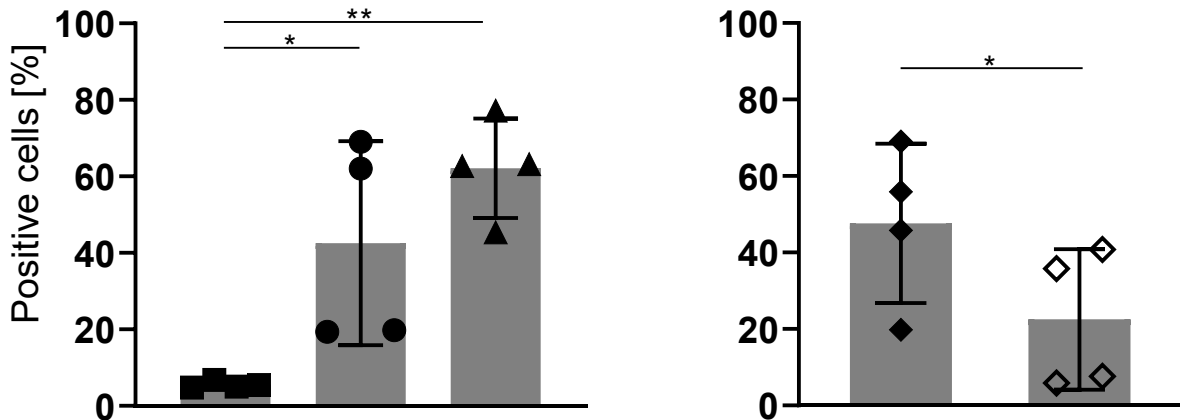

## CD107a

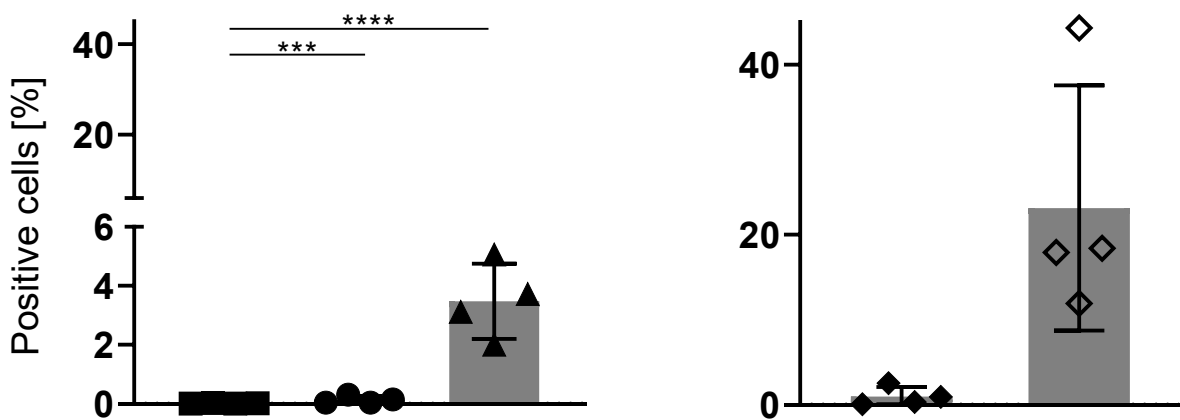

■ Vδ2untouched

● Vδ2IPP/IL-15 stim

▲ Vδ2IPP/IL-15/IL-12 stim

◆ Before MLC

◇ After MLC

**Supplementary Figure S3: CD107a, granzyme B and perforin expression in diversely stimulated Vδ2<sup>+</sup> T cell populations.** Vδ2<sup>+</sup> T cells were isolated and cultured as described in Materials and Methods. Expression of CD107a, granzyme B and perforin in untouched, IPP/IL-15-stimulated, and IPP/IL-15/IL-12-stimulated Vδ2<sup>+</sup> T cells were analyzed by flow cytometry (left). Expression of CD107a, granzyme B and perforin in IPP/IL-15-stimulated Vδ2<sup>+</sup> T cells was analyzed before and after 4 hours of MLC (right). In MLC, isolated IPP/IL-15-stimulated Vδ2<sup>+</sup> T cells were co-cultured with autologous PBMCs. FITC-anti-CD107a antibody was simultaneously added directly to the cell culture medium and cells were incubated for 4 hours at 37°C with 10 μg/ml of brefeldin A (Biolegend) as well as 6 μg/ml of monensin (Golgi-Stop, BD). Then granzyme B and perforin were intracellularly stained as described in Materials and Methods. Bars represent the mean ± SD. \* = p < 0.05, \*\* = p < 0.01, \*\*\* = p < 0.001, \*\*\*\* = p < 0.0001.

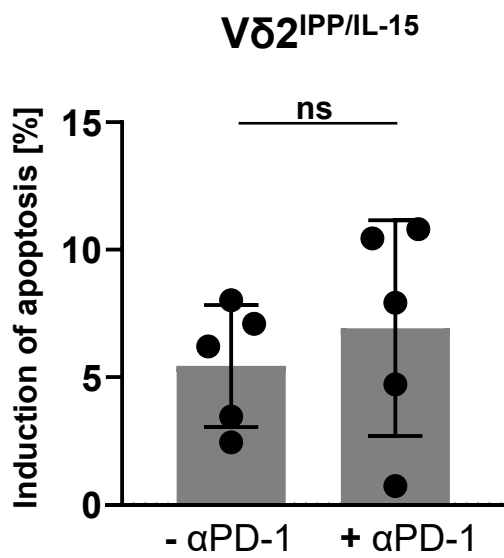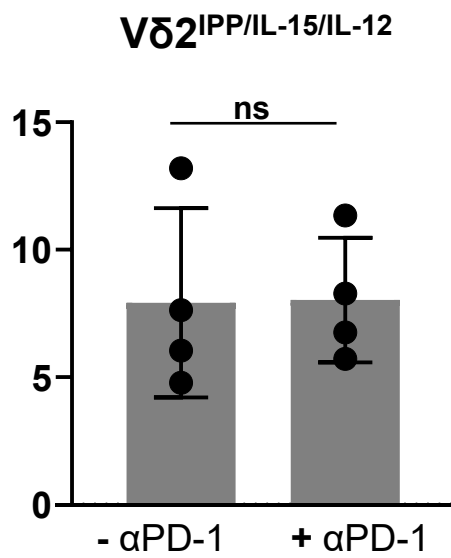

**Supplementary Figure S4: Induction of apoptosis in  $\alpha\beta$  T cells in the presence of suppressive V $\delta$ 2<sup>+</sup> T cells and an anti-PD-1 antibody (Pembrolizumab).** V $\delta$ 2<sup>+</sup> T cells were stimulated with IPP/IL-15 (n=5) or with IPP/IL-15/IL-12 (n=4) for the apoptosis assay as described in Materials and Methods. Positively isolated V $\delta$ 2<sup>+</sup> T cells were cultured at a 1:1 cell ratio with autologous PBMCs activated by anti-CD3/anti-CD28 Dynabeads. PD-1/PD-L1 interaction in MLC was blocked by Pembrolizumab at a concentration of 5  $\mu$ g/ml. On day 1 of MLC, apoptotic  $\alpha\beta$  T cells were measured with flow cytometry. Apoptotic cells were defined as annexin V<sup>+</sup> cells and relative frequency of apoptotic cells was calculated by subtracting the frequency of annexin V<sup>+</sup> cells in CD3/CD28-stimulated  $\alpha\beta$  T cells in the absence of V $\delta$ 2<sup>+</sup> T cells. Student's t test was used to assess significance. Bars represent the mean  $\pm$  SD. ns; not significant.

**U251**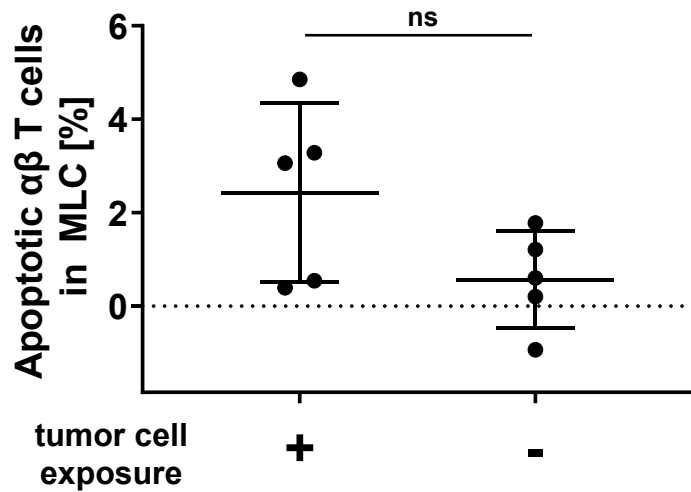**SK-Mel-28**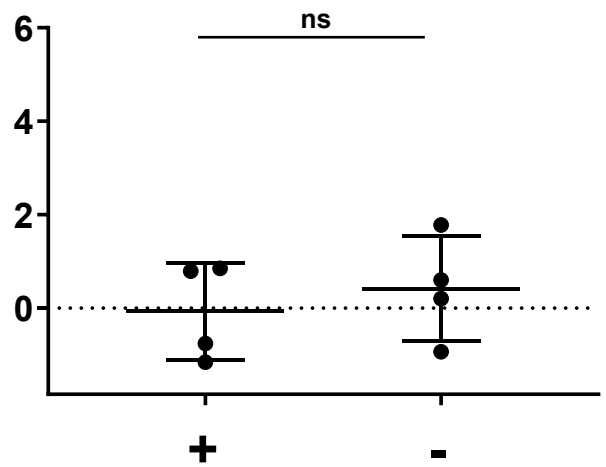

**Supplementary Figure S5: BTN3A1-expressing tumor cells do not endow  $V\delta 2^+$  T cells with apoptosis inducing function.** After 48-hour co-culture of untouched  $V\delta 2^+$  T cells with BTN3A1 expressing U251 or SK-Mel-28 cells,  $V\delta 2^+$  T cells were harvested and subsequently co-cultured at a 1:1 cell ratio with autologous PBMCs that had been activated by anti-CD3/anti-CD28 Dynabeads for 48 hours. On day 1 of MLC, apoptotic  $\alpha\beta$  T cells were measured with flow cytometry. Apoptotic cells were defined as annexin V<sup>+</sup> cells and relative frequency of apoptotic cells was calculated by subtracting the frequency of annexin V<sup>+</sup> cells in CD3/CD28-stimulated  $\alpha\beta$  T cells in the absence of  $V\delta 2^+$  T cells. The data were obtained using  $V\delta 2^+$  T cells from 5 different healthy donors for U251 and 4 different healthy donors for SK-Mel-28. Student's test was used to assess significance. Bars represent the mean  $\pm$  SD. ns; not significant.

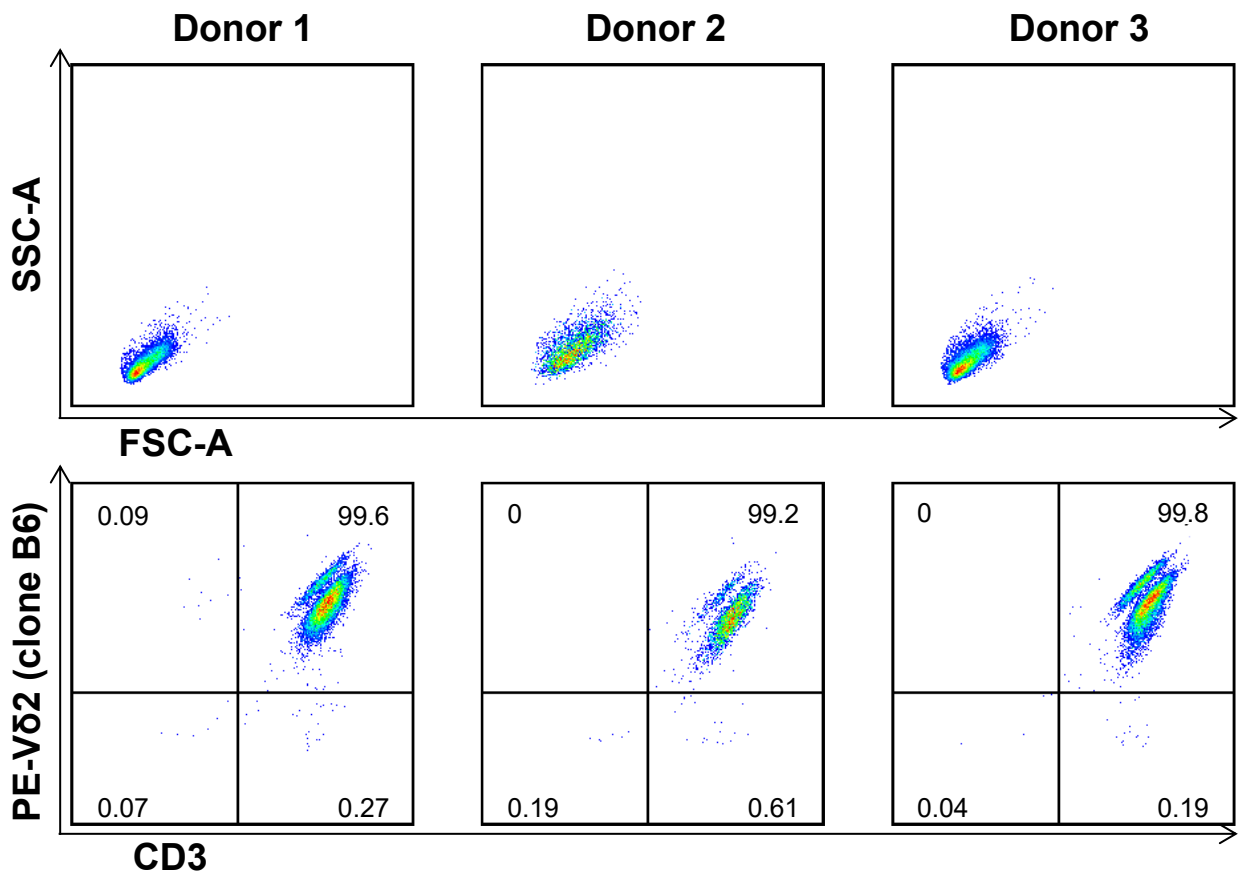

**Supplementary Figure S6: Purity of Vδ2<sup>+</sup> T cells after positive (TCR crosslink) isolation used for the experiments shown in Figure 5a.** Vδ2<sup>+</sup> T cells were positively isolated from PBMCs by using PE-anti-Vδ2 antibody (clone B6, Miltenyi Biotec) and anti-PE MicroBeads. Isolated cells were stained with the live/dead fixable violet dead cell stain kit (Invitrogen), PE-anti-Vδ2 antibody (clone B6, Miltenyi Biotec), and PerCP-anti-CD3 antibody (clone UCHT1, BioLegend). Shown are all live cells plotted for FSC-A/SSC-A (top) – to show that there are no contaminating myeloid cells in the isolates - and plotted for CD3/Vδ2 (bottom). Results from three representative donors are shown.

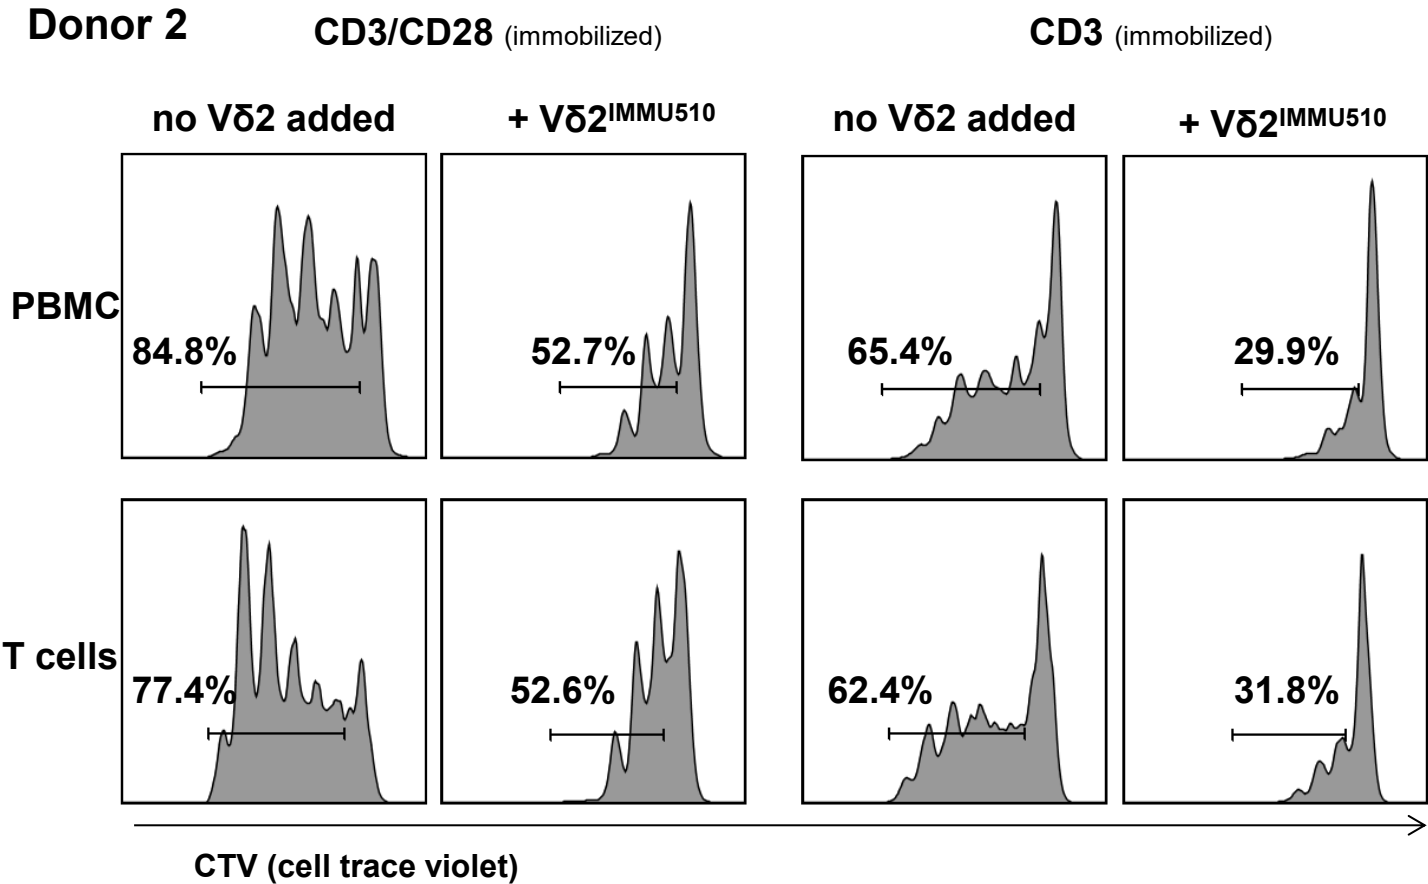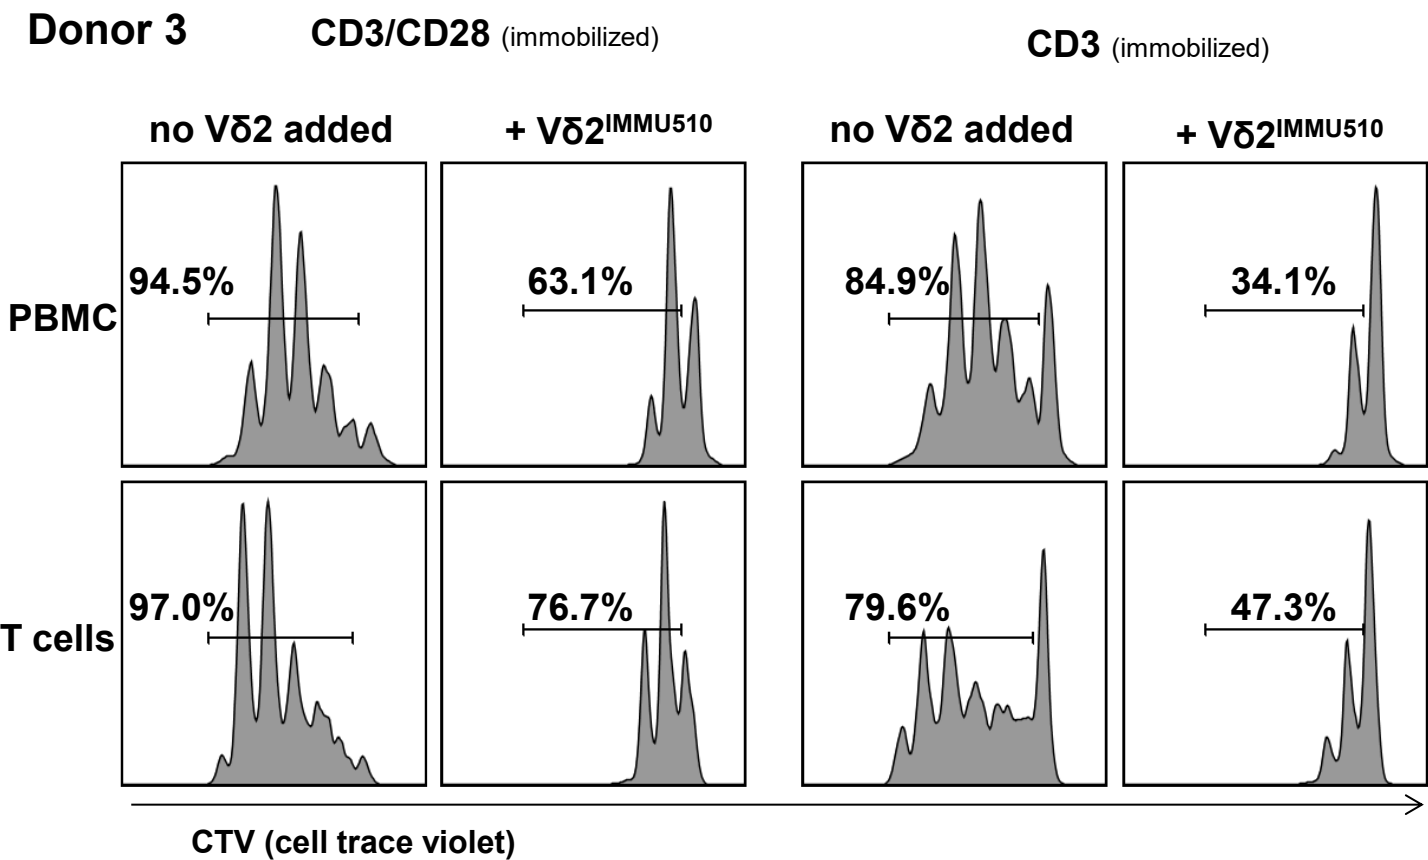

**Supplementary Figure S7: CD28 stimulation is not essential for V $\delta$ 2<sup>+</sup> T cells to suppress autologous  $\alpha\beta$  T cells. Suppressive activity of V $\delta$ 2<sup>+</sup> T cells on autologous  $\alpha\beta$  T cells without CD28-stimulation.** V $\delta$ 2<sup>+</sup> T cells were positively isolated from fresh peripheral blood and stimulated by immobilized anti-TCR $\gamma\delta$  antibody (IMMU510, 1  $\mu$ g/ml) for 24 hours and then co-cultured at a 1:1 cell ratio with autologous CTV-labelled autologous PBMCs or CD3<sup>+</sup> T cells on CD3- or CD3/CD28-coated wells. On day3 of MLC, proliferation of  $\alpha\beta$  T cells was measured with flow cytometry. Shown are the representative data from two donors, donor2 and donor3 (data for donor 1 are shown in Figure 5a).

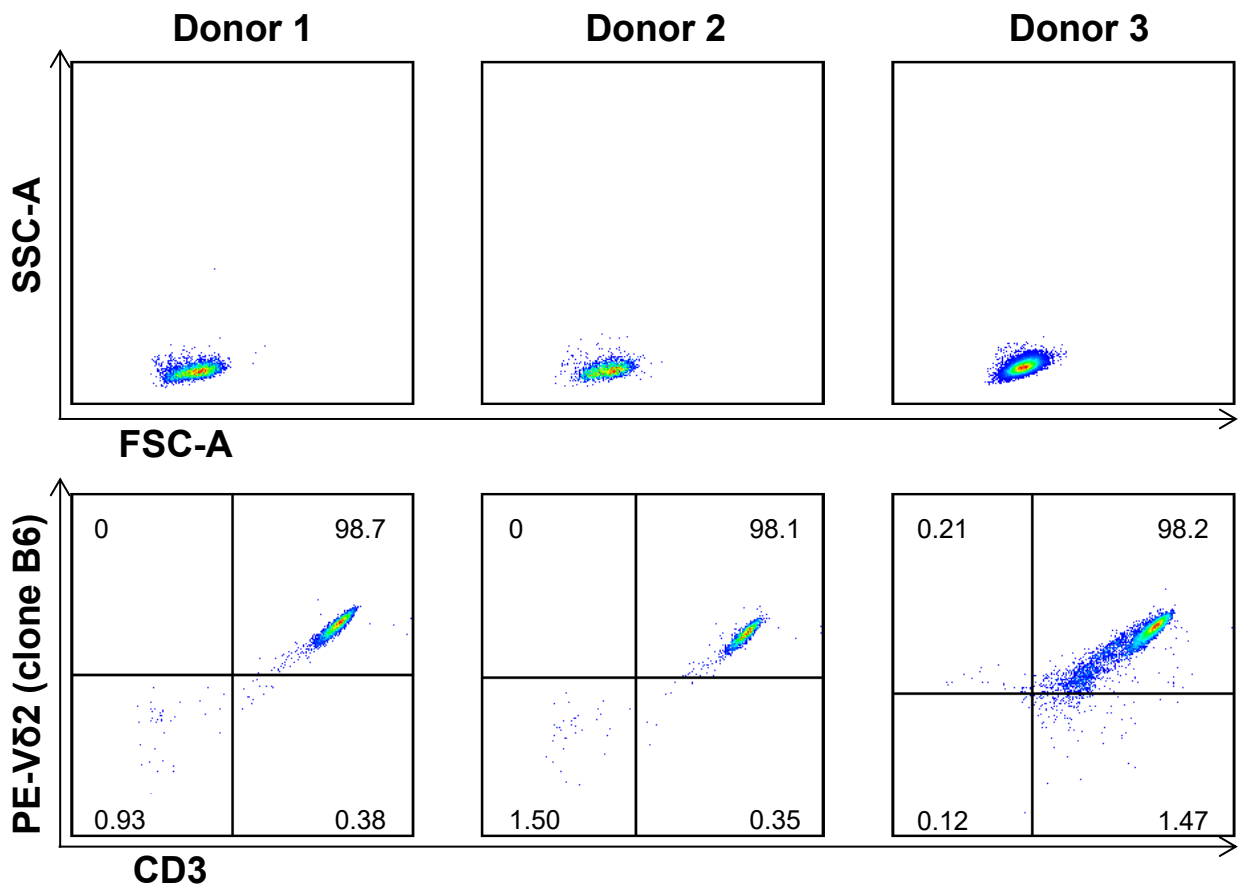

**Supplementary Figure S8: Purity of  $V\delta 2^+$  T cells after negative (untouched) isolation used for the experiments shown in Figure 5b.** Untouched  $V\delta 2^+$  T cells were isolated from freshly isolated PBMCs with a custom-made gammadelta T cell isolation kit (Stemcell Technologies) designed for negative isolation, and subsequently  $V\delta 1^+$  T cells were depleted *via* the combination of PE-anti- $V\delta 1$  antibody (clone REA173, Miltenyi Biotec) and anti-PE MicroBeads. Aliquots of untouched isolated  $V\delta 2^+$  T cells were stained with the live/dead fixable violet dead cell staining kit (Invitrogen), FITC-anti- $V\delta 2$  antibody (clone B6, BioLegend), and PerCP-anti-CD3 antibody (clone UCHT1, BioLegend). Shown are all live singlet cells plotted for FSC-A/SSC-A (top) and plotted for CD3/ $V\delta 2$  (bottom).



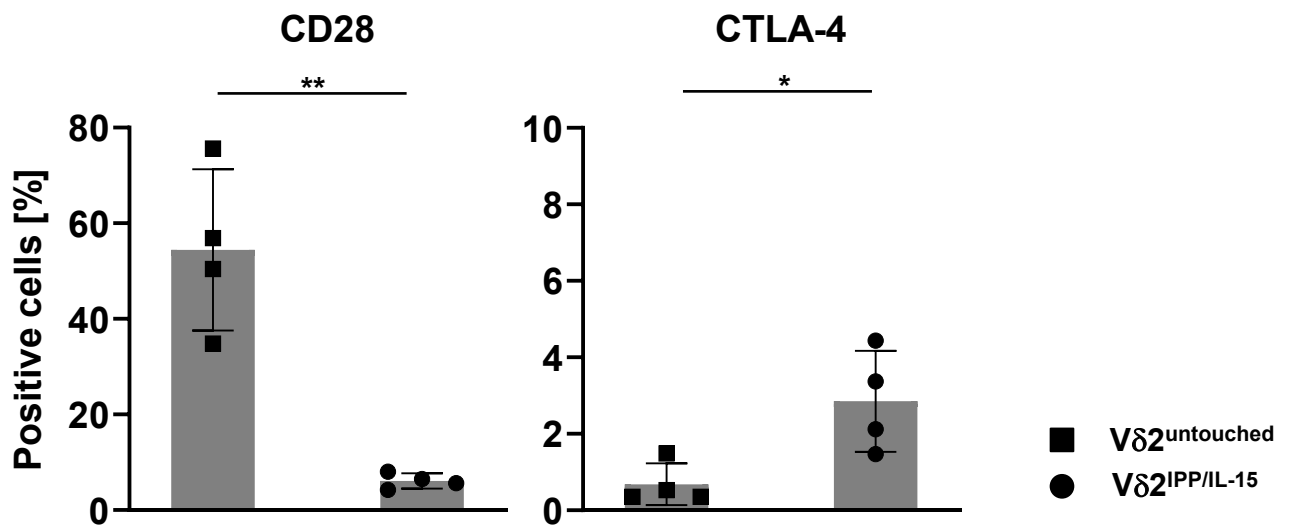

**Supplementary Figure S9: Expression of CD28 and CTLA-4 in resting and activated  $V\delta 2^+$  T cells.**  $V\delta 2^+$  T cells were isolated and cultured as described in Materials and Methods. Untouched and IPP/IL-15-stimulated  $V\delta 2^+$  T cells were analyzed by flow cytometry for CD28 and CTLA-4 expression. The data were generated using  $V\delta 2^+$   $\gamma\delta$  T cells obtained from 4 different donors. Student's t test was used to assess significances. Bars represent the mean  $\pm$  SD. \* =  $p < 0.05$ , \*\* =  $p < 0.01$ .
